# Supplementary material for: Complementary Approaches to Existing Target Based Drug Discovery for Identifying Novel Drug Targets
Source: MDPI journal article supplement (doi:10.3390/biomedicines4040027), 2016-11-21

## Sahas Vasaikar, Pooja Bhatia, Partap G. Bhatia and Koon Chu Yaiw

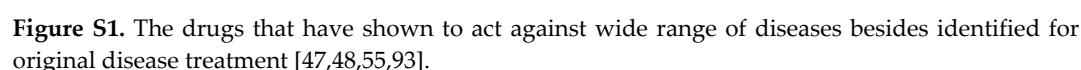

Supplement: s1 [file s1]
